# Supplementary material for: Phytaspase is Capable of Detaching the Endoplasmic Reticulum Retrieval Signal from Tobacco Calreticulin-3
Source: Preprints.org preprint supplement (doi:10.20944/preprints202311.0708.v1), 2023-11-10
Supplement: Supplementary file 1 [file supplementary]

**Figure S1.** Mass spectra of Lys-C peptides originated from **(a)** non-treated and **(b)** *Nt*Phyt-treated CRT3 bands (arrows in Figure 1A); **(c)** non-treated and **(d)** *Nt*Phyt-treated CRT3 D420E bands (lanes 3 and 4 in Figure 2A). Positions of the characteristic C-terminal semi-LysC peptides and of the N-terminal peptides are marked in red.

**Figure S2.** MS/MS fragmentation spectra of the characteristic C-terminal semi-LysC peptides of CRT3 (**(a)** non-treated, **(b)** *Nt*Phyt-treated) and CRT3 D420E mutant (**(c)** non-treated, **(d)** *Nt*Phyt-treated) marked in Figure S1.


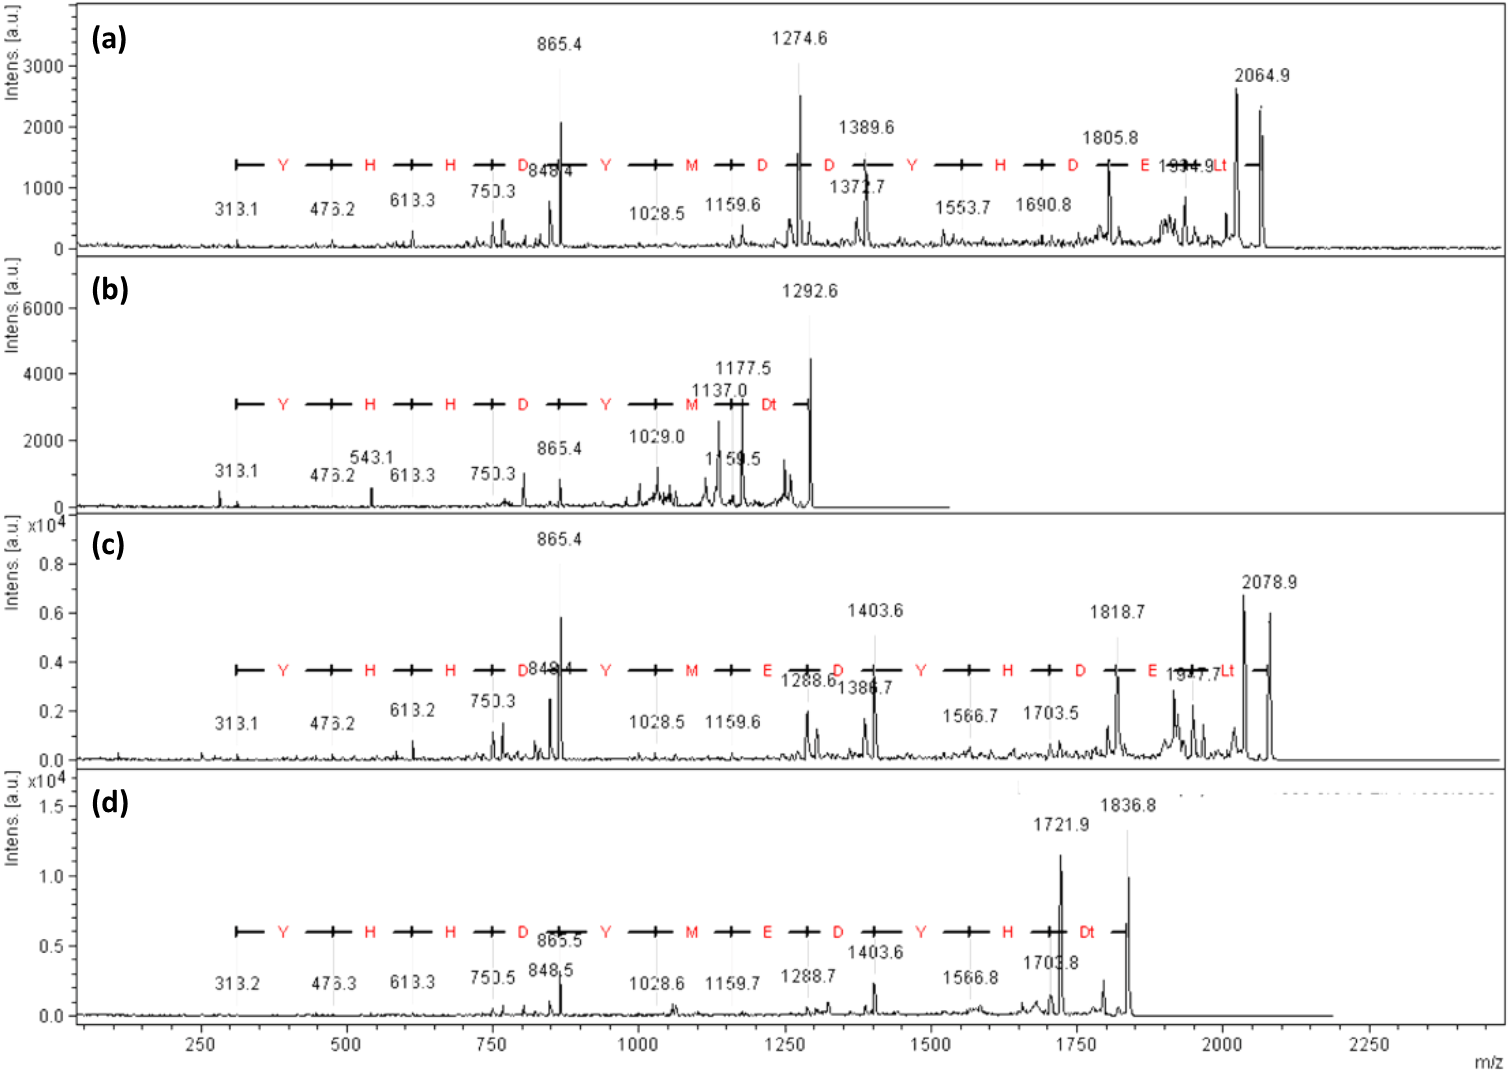


**Figure S3.** Sequence coverage of the apoplastic 26 kDa CRT3 fragment originated from EGFP_CRT3_C6 protein with mass spectrometry-identified peptides.

Sequences of tryptic (blue upper bracket) and Glu-C (red bottom bracket) peptides for which identity was confirmed by MS/MS fragmentation are shown. Boundaries of the N-, P-, and C-terminal domains of *Nt*CRT3 are indicated below the amino acid sequence.


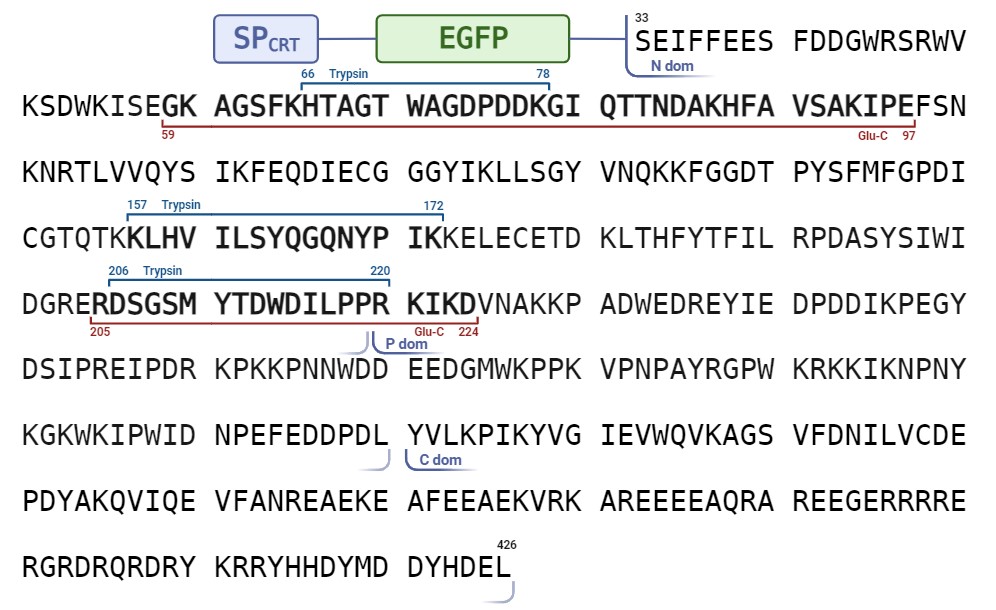


**Table S1.** List of the primers used in this study.

| # | Primer name | Sequence |
| --- | --- | --- |
| 1 | CRT3_Pst700_dir | AAGCCTGCAGACTGGGAAGAC |
| 2 | CRT3_D420E_Sac_rev | CGGAGCTCTTAAAGTTCATCATGGTAGTCTTCCATATAATC |
| 3 | CRT_Kpn_Nco_dir | CAAGGTACCATGGCTCTCTCTGAGCATAAAC |
| 4 | CRT_SP_Sal_rev | GTGGTCGACGAAAATCTCAGATGCTGAAG |
| 5 | CRT_LF_Apa_Nde_dir | GAGGGCCCGCATCTCATATGTCTGAGATTTTCTTTGAAGAAAG |
| 6 | CRT_1-420_Sac_rev | CGGAGCTCTTAATCCATATAATCGTGGTGATAGC |
| 7 | EGFP_Sal_dir | GAGGTCGACAAATCTGAGATGGTGAGCAAGGGCGAG |
| 8 | EGFP_Apa_rev | GTGGGCCCACCTGGAGACTTGTACAGCTCGTCCATGC |
| 9 | pLH_seq_dir | GACCTCGAGAATTCTCAAC |
| 10 | NtPhyt-His_rev | GGGAGCTCTTAATGGTGATGATGATGGTGCAGAGGATCCACTCCTATG |
